# Supplementary material for: Au nanoclusters-decorated WO3 nanorods for ultrasensitive photoelectrochemical sensing of Hg2+
Source: Royal Society of Chemistry journal article supplement (doi:10.1039/d2an01324j), 2022-01-01
Supplement: d2an01324j1.pdf [file d2an01324j1.pdf]

**Au nanoclusters-decorated WO<sub>3</sub> nanorods for ultrasensitive photoelectrochemical sensing of Hg<sup>2+</sup>**

Si Dai, Hui Huang, Shihan Liu, Wenfang Deng, Yueming Tan\*, and Qingji Xie

*Key Laboratory of Chemical Biology and Traditional Chinese Medicine Research (Ministry of Education of China), College of Chemistry and Chemical Engineering, Hunan Normal University, Changsha 410081, China*

Email: tanyueming0813@hunnu.edu.cn

### ***Instrumentation***

Transmission electron microscopy (TEM) studies were performed on a TECNAI F-30 high-resolution transmission electron microscope. Scanning electron microscopy (SEM) studies were performed on a Hitachi S4800 scanning electron microscope. X-ray diffraction (XRD) pattern was obtained on a PANalytical X'pert Pro X-ray diffractometer using Cu K $\alpha$  radiation, operating at 40 kV and 30 mA, with a scan rate of 4° min<sup>-1</sup>. X-ray photoelectron spectroscopy (XPS) measurement was investigated using a PHI QUANTUM 2000 X-ray photoelectron spectroscopic instrument. Ultraviolet-Visible (UV-Vis) spectra were obtained on U3310 UV-Vis spectrometer (Hitachi, Japan). Fourier transform infrared (FTIR) spectrum was collected on Nicolet Nexus 670 Fourier transform infrared spectrometer. All electrochemical experiments were carried out on the CHI760E electrochemical workstation. All photoelectrochemical experiments were carried out on electrochemical workstation (ZENNIUM, ZAHNER-elektrok GmbH & Co. KG, Germany) equipped with a controlled-intensity modulated-photospectroscopy setup (CIMPS, PP211, ZAHNERelektrok GmbH & Co. KG, Germany). A white light lamp (WLC02, ZAHNER-elektrok GmbH & Co. KG, Germany) with a visible-light filter (400-700 nm) was used as the light source.

### ***Chemicals***

Sodium tungstate, sodium chloride, mercury chloride, copper chloride, iron chloride, zinc chloride, cobalt chloride, potassium chloride, chromium chloride, calcium chloride, cadmium chloride, nickel chloride, hydrochloric acid and ascorbic acid (AA) were purchased from Sinophem Chemical Reagents Co. LTD. (Shanghai, China). Glutathione was purchased from Aladdin. H<sub>2</sub>AuCl<sub>4</sub>·3H<sub>2</sub>O, 4-chloro-1-naphthol were purchased from Sigma Aldrich. All

reagents are analytical pure and used without further purification. Milli-Q ultrapure water (Millipore,  $\geq 18 \text{ M}\Omega \text{ cm}$ ) was used throughout.

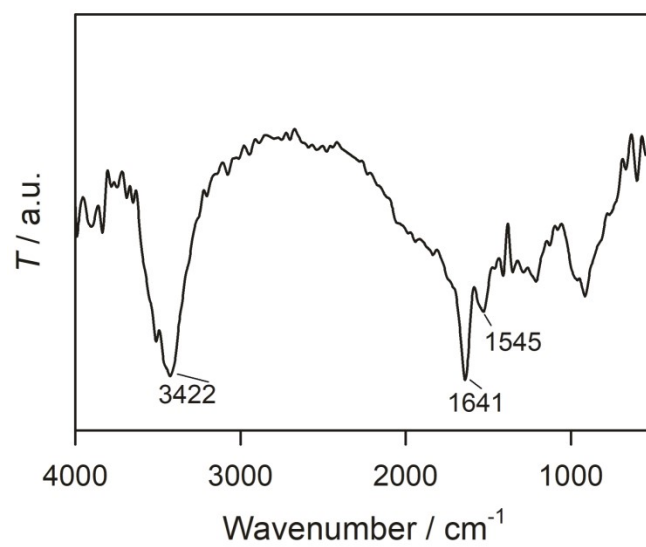

**Fig. S1** FT-IR spectrum of AuNCs.

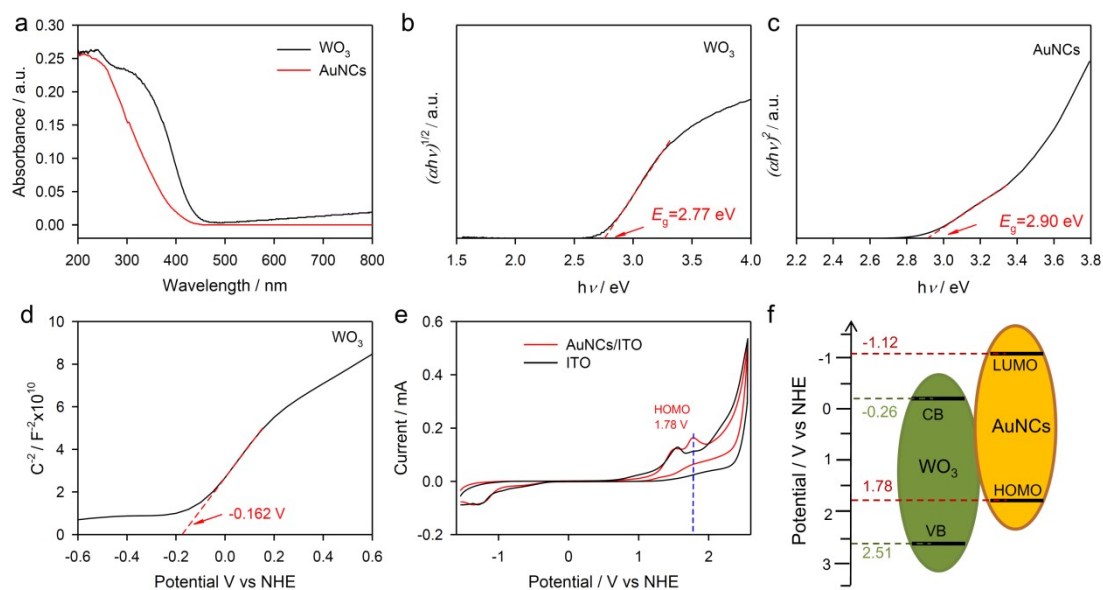

**Fig. S2** (a) UV-vis diffuse reflectance spectra of WO<sub>3</sub> and AuNCs. (b) Plot of  $(\alpha h\nu)^{1/2}$  versus  $h\nu$  for WO<sub>3</sub>. (c)  $(\alpha h\nu)^2$  versus  $h\nu$  for AuNCs. (d) Mott-Schottky plot of WO<sub>3</sub>. (e) Cyclic voltammogram of AuNCs in degassed acetonitrile solution containing 0.1 M tetrabutyl ammonium perchlorate. (f) Illustration of energy-levels of AuNCs and WO<sub>3</sub>.

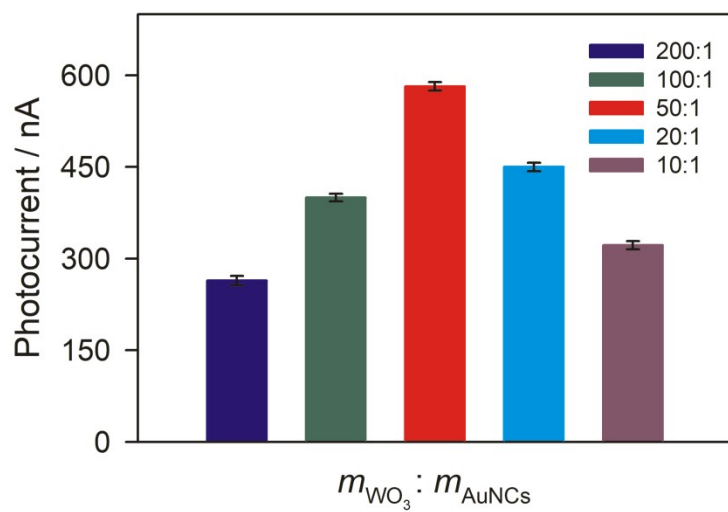

**Fig. S3** Effects of weight ratios of WO<sub>3</sub> to AuNCs in WO<sub>3</sub>/AuNCs on transient photocurrents of the prepared WO<sub>3</sub>/AuNCs.

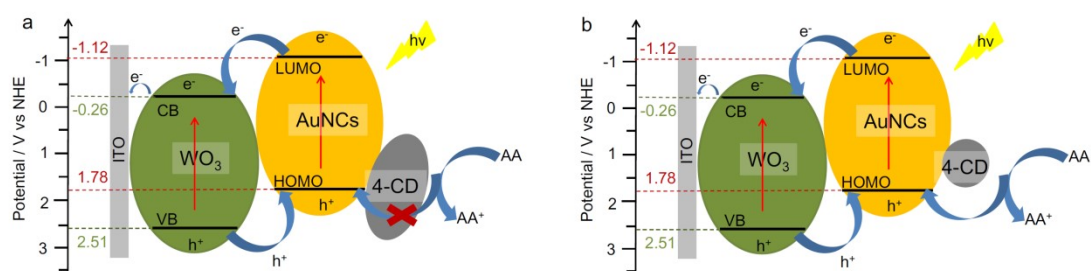

**Scheme S1** (a) Charge transfer pathway of WO<sub>3</sub>/AuNCs/ITO after 4-CN + H<sub>2</sub>O<sub>2</sub> incubation.

(b) Charge transfer pathway of WO<sub>3</sub>/AuNCs/ITO after Hg<sup>2+</sup> incubation and then 4-CN + H<sub>2</sub>O<sub>2</sub> incubation.

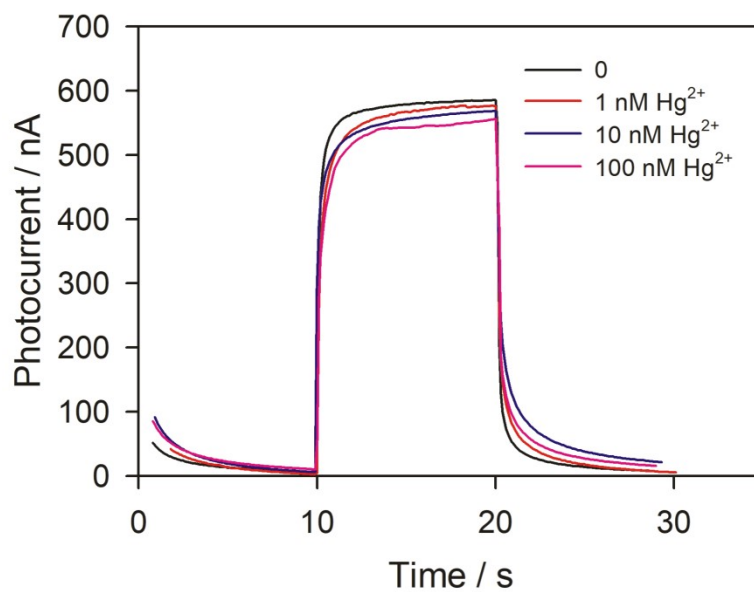

**Fig. S4** Transient photocurrents of WO<sub>3</sub>/AuNCs/ITO after the incubation with different concentrations of Hg<sup>2+</sup>.



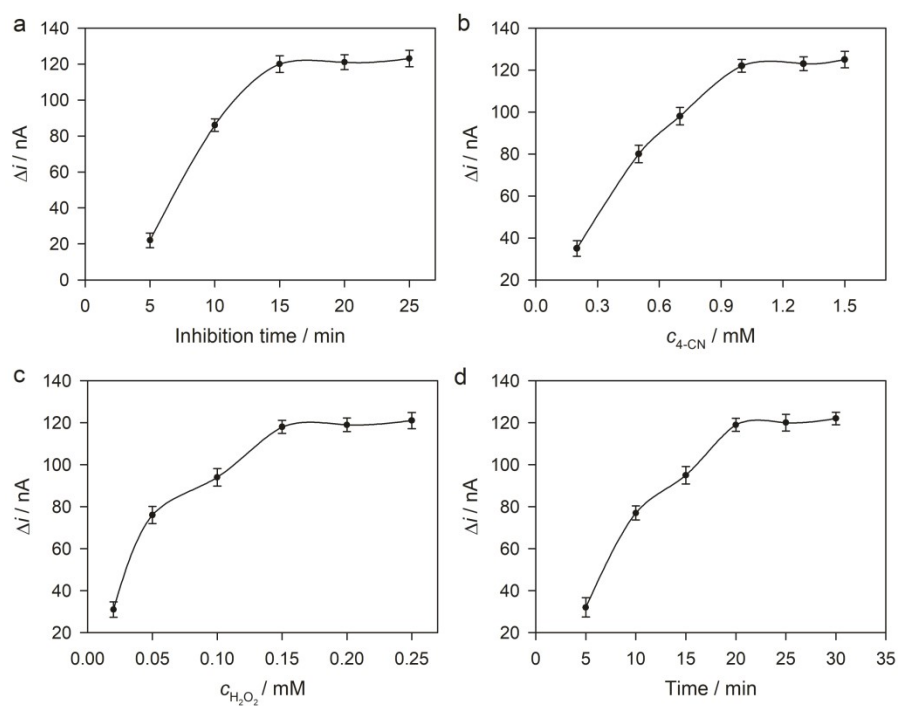

**Fig. S5** Effects of (a)  $\text{Hg}^{2+}$  inhibition time, (b) 4-CN concentration, (c)  $\text{H}_2\text{O}_2$  concentration, and (d) precipitation reaction time on photocurrent responses for detecting 10 nM  $\text{Hg}^{2+}$ .

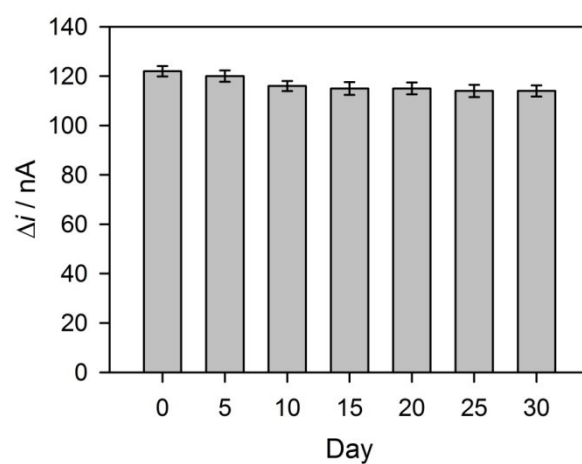

**Fig. S6** Storage stability of the PEC sensor for detection of 10 nM  $\text{Hg}^{2+}$ .

**Table S1. The comparison of the determination of Hg<sup>2+</sup> in the literature.**

| Technique                            | Linear range<br>(pM)                | Detection limit<br>(pM) | Ref.      |
|--------------------------------------|-------------------------------------|-------------------------|-----------|
| Electrochemistry                     | $1.0 \times 10^4 - 1.0 \times 10^6$ | $5.8 \times 10^3$       | 1         |
| Electrochemistry                     | $1.0 \times 10^2 - 1.3 \times 10^5$ | 30                      | 2         |
| Electrochemistry                     | $5.0 \times 10^2 - 5.0 \times 10^6$ | $2.3 \times 10^2$       | 3         |
| Colorimetry                          | $3.0 \times 10^3 - 5.0 \times 10^5$ | $3.0 \times 10^3$       | 4         |
| Colorimetry                          | $2.0 \times 10^4 - 2.0 \times 10^7$ | $5.0 \times 10^3$       | 5         |
| Fluorescence                         | 10- $1.0 \times 10^5$               | 4.5                     | 6         |
| Fluorescence                         | 100- $1.0 \times 10^5$              | 65                      | 7         |
| Fluorescence                         | $1.0 \times 10^3 - 5.0 \times 10^6$ | $3.5 \times 10^2$       | 8         |
| Fluorescence                         | $1.0 \times 10^5 - 6.0 \times 10^6$ | $3.8 \times 10^3$       | 9         |
| Fluorescence                         | 0- $1.6 \times 10^3$                | $1.1 \times 10^2$       | 10        |
| Surface-enhanced Raman<br>scattering | 1- $10^3$                           | 0.4                     | 11        |
| Surface-enhanced Raman<br>scattering | 100- $10^4$                         | 30                      | 12        |
| Photoelectrochemistry                | 1.0- $2.0 \times 10^3$              | 1.0                     | 13        |
| Photoelectrochemistry                | 1.0- $5.0 \times 10^3$              | 0.5                     | 14        |
| Photoelectrochemistry                | 1.0- $5.0 \times 10^4$              | 0.2                     | This work |

**Table S2. Results of determination of Hg<sup>2+</sup> in a river water sample.**

| Original<br>(pM) | Added<br>(pM) | Detected<br>(pM) | Recovery (%) | RSD |
|------------------|---------------|------------------|--------------|-----|
|                  | 10.00         | 58.30            | 94.0         | 3.3 |
| 52.00            | 100.0         | 146.0            | 96.0         | 4.7 |
|                  | 1000          | 1092             | 104          | 1.1 |

## References

- 1 G. Li, Z. Li, X. You, J. Chen and S. Tang, *Talanta* 2016, **161**, 138-142.
- 2 H. Wang, Y. Zhang, H. Ma, X. Ren, Y. Wang, Y. Zhang and Q. Wei, *Biosens. Bioelectron.* 2016, **86**, 907-912.
- 3 X. Song, Y. Wang, S. Liu, X. Zhang, H. Wang, J. Wang and J. Huang, *Analyst* 2018, **143**, 5771-5778.
- 4 N. Chen, Y. Zhang, H. Liu, X. Wu, Y. Li, L. Miao, Z. Shen and A. Wu, *ACS Sens.* 2016, **1**, 521-527.
- 5 C. Ma, Y. Ma, Y. Sun, Y. Lu, E. Tian, J. Lan, J. Li, W. Ye and H. Zhang, *J. Colloid Interface Sci.* 2019, **537**, 554-561.
- 6 X. Li, J. Xie, B. Jiang, R. Yuan and Y. Xiang, *ACS Appl. Mater. Interfaces* 2017, **9**, 5733-5738.
- 7 S. Wang, X. Li, J. Xie, B. Jiang, R. Yuan and Y. Xiang, *Sens. Actuators B Chem.* 2018, **259**, 730-735.
- 8 S. H. Liu, Y. Jia, H. Dong, X. D. Yu, D.-P. Zhang, X. Ren, Y. Y. Li and Q. Wei, *Anal. Chem.* 2020, **92**, 10935-10939.
- 9 H. Wu and C. Tong, *Anal. Chem.* 2020, **92**, 8859-8866.
- 10 R. Pavadai, A. Amalraj, S. Subramanian and P. Perumal, *ACS Appl. Mater. Interfaces* 2021, **13**, 31710-31724.
- 11 H. Wu and C. Tong, *Anal. Chem.* 2020, **92**, 8859-8866.
- 12 W. Liao, Y. Chen, L. Huang, Y. Wang, Y. Zhou, Q. Tang, Z. Chen and K. Liu, *Microchim. Acta* 2021, **188**, 354.

- 13 Q. Jiang, H. Wang, X. Wei, Y. Wu, W. Gu, L. Hu and C. Zhu, *Anal. Chim. Acta* 2020, **1119**, 11-17..
- 14 L. Zhang, L. Feng, P. Li, X. Chen, C. Xu, S. Zhang, A. Zhang, G. Chen and H. Wang, *Chem. Eng. J.* 2021, **409**, 128154.
